# Supplementary material
Source: publisher figshare collection journal article supplement (https://acs.figshare.com/ndownloader/files/6570102)
Supplement: Supplementary file 1 [file 6570102]

 
data_t5 
 
_audit_creation_method            SHELXL-97 
_chemical_name_systematic 
; 
 ? 
; 
_chemical_name_common             ? 
_chemical_melting_point           ? 
_chemical_formula_moiety          ? 
_chemical_formula_sum 
 'C16 H23 N O2 Si' 
_chemical_formula_weight          289.44 
 
loop_ 
 _atom_type_symbol 
 _atom_type_description 
 _atom_type_scat_dispersion_real 
 _atom_type_scat_dispersion_imag 
 _atom_type_scat_source 
 'C'  'C'   0.0033   0.0016 
 'International Tables Vol C Tables 4.2.6.8 and 6.1.1.4' 
 'H'  'H'   0.0000   0.0000 
 'International Tables Vol C Tables 4.2.6.8 and 6.1.1.4' 
 'N'  'N'   0.0061   0.0033 
 'International Tables Vol C Tables 4.2.6.8 and 6.1.1.4' 
 'O'  'O'   0.0106   0.0060 
 'International Tables Vol C Tables 4.2.6.8 and 6.1.1.4' 
 'Si'  'Si'   0.0817   0.0704 
 'International Tables Vol C Tables 4.2.6.8 and 6.1.1.4' 
 
_symmetry_cell_setting            triclinic
_symmetry_space_group_name_H-M   'P -1'
_symmetry_space_group_name_hall  '-P 1' 
 
loop_ 
 _symmetry_equiv_pos_as_xyz 
 'x, y, z' 
 '-x, -y, -z' 
 
_cell_length_a                    11.211(10) 
_cell_length_b                    12.349(11) 
_cell_length_c                    12.562(11) 
_cell_angle_alpha                 109.016(18) 
_cell_angle_beta                  90.043(17) 
_cell_angle_gamma                 101.568(17) 
_cell_volume                      1607(3) 
_cell_formula_units_Z             4 
_cell_measurement_temperature     100(2) 
_cell_measurement_reflns_used     1799
_cell_measurement_theta_min       2.8613
_cell_measurement_theta_max       26.3963
 
_exptl_crystal_description        Columnar
_exptl_crystal_colour             Yellow
_exptl_crystal_size_max           0.25
_exptl_crystal_size_mid           0.12
_exptl_crystal_size_min           0.10
_exptl_crystal_density_meas       'not measured'
_exptl_crystal_density_diffrn     1.196 
_exptl_crystal_density_method     'not measured' 
_exptl_crystal_F_000              624 
_exptl_absorpt_coefficient_mu     0.148 
_exptl_absorpt_correction_type    multi-scan
_exptl_absorpt_correction_T_min   0.3922  
_exptl_absorpt_correction_T_max   0.7454
_exptl_absorpt_process_details    'TWINABS V2008/1 (Bruker AXS)'
 
_exptl_special_details 
; 
 ? 
; 
 
_diffrn_ambient_temperature       100(2) 
_diffrn_radiation_wavelength      0.71073 
_diffrn_radiation_type            MoK\a 
_diffrn_radiation_source          'fine-focus sealed tube' 
_diffrn_radiation_monochromator   graphite 
_diffrn_measurement_device_type   'Bruker APEX-II CCD'
_diffrn_measurement_method        '\f and \w scans'
_diffrn_detector_area_resol_mean  8.3333
_diffrn_reflns_number             6252 
_diffrn_reflns_av_R_equivalents   0.0000 
_diffrn_reflns_av_sigmaI/netI     0.1487 
_diffrn_reflns_limit_h_min        -14 
_diffrn_reflns_limit_h_max        13 
_diffrn_reflns_limit_k_min        -14 
_diffrn_reflns_limit_k_max        15 
_diffrn_reflns_limit_l_min        -15 
_diffrn_reflns_limit_l_max        0 
_diffrn_reflns_theta_min          1.86 
_diffrn_reflns_theta_max          27.38 
_reflns_number_total              6252 
_reflns_number_gt                 3772 
_reflns_threshold_expression      >2sigma(I) 
 
_computing_data_collection        'APEX2 (Bruker AXS, 2010)'
_computing_cell_refinement        'SAINT V7.68A (Bruker AXS, 2009)'
_computing_data_reduction         'SAINT V7.68A (Bruker AXS, 2009)'
_computing_structure_solution     'SHELXS-97 (Sheldrick, 2008)'
_computing_structure_refinement   'SHELXL-97 (Sheldrick, 2008)'
_computing_molecular_graphics     'SHELXTL (Sheldrick, 2008)'
_computing_publication_material   'SHELXTL' 
 
_refine_special_details 
; 
 Refinement of F^2^ against ALL reflections.  The weighted R-factor wR and 
 goodness of fit S are based on F^2^, conventional R-factors R are based 
 on F, with F set to zero for negative F^2^. The threshold expression of 
 F^2^ > 2sigma(F^2^) is used only for calculating R-factors(gt) etc. and is 
 not relevant to the choice of reflections for refinement.  R-factors based 
 on F^2^ are statistically about twice as large as those based on F, and R- 
 factors based on ALL data will be even larger. 
; 
 
_refine_ls_structure_factor_coef  Fsqd  
_refine_ls_matrix_type            full 
_refine_ls_weighting_scheme       calc  
_refine_ls_weighting_details 
 'calc w=1/[\s^2^(Fo^2^)+(0.1885P)^2^+0.0000P] where P=(Fo^2^+2Fc^2^)/3' 
_atom_sites_solution_primary      direct 
_atom_sites_solution_secondary    difmap 
_atom_sites_solution_hydrogens    geom 
_refine_ls_hydrogen_treatment     constr
_refine_ls_extinction_method      none 
_refine_ls_extinction_coef        ? 
_refine_ls_number_reflns          6252 
_refine_ls_number_parameters      372 
_refine_ls_number_restraints      0 
_refine_ls_R_factor_all           0.1585 
_refine_ls_R_factor_gt            0.1046 
_refine_ls_wR_factor_ref          0.2993 
_refine_ls_wR_factor_gt           0.2574 
_refine_ls_goodness_of_fit_ref    1.003 
_refine_ls_restrained_S_all       1.003 
_refine_ls_shift/su_max           0.000 
_refine_ls_shift/su_mean          0.000 
 
loop_ 
 _atom_site_label 
 _atom_site_type_symbol 
 _atom_site_fract_x 
 _atom_site_fract_y 
 _atom_site_fract_z 
 _atom_site_U_iso_or_equiv 
 _atom_site_adp_type 
 _atom_site_occupancy 
 _atom_site_symmetry_multiplicity 
 _atom_site_calc_flag 
 _atom_site_refinement_flags 
 _atom_site_disorder_assembly 
 _atom_site_disorder_group 
C1 C 0.5583(6) 0.1058(6) 0.3357(6) 0.0282(17) Uani 1 1 d . . . 
H1A H 0.5500 0.0220 0.3237 0.042 Uiso 1 1 calc R . . 
H1B H 0.5918 0.1233 0.2697 0.042 Uiso 1 1 calc R . . 
H1C H 0.4780 0.1261 0.3467 0.042 Uiso 1 1 calc R . . 
C2 C 0.6994(5) 0.3469(6) 0.4521(6) 0.0200(15) Uani 1 1 d . . . 
C3 C 0.6858(5) 0.4562(6) 0.5373(5) 0.0181(14) Uani 1 1 d . . . 
C4 C 0.7380(5) 0.5779(6) 0.5266(5) 0.0162(14) Uani 1 1 d . . . 
C5 C 0.8808(5) 0.5986(5) 0.5295(5) 0.0170(14) Uani 1 1 d . . . 
C6 C 0.9385(5) 0.6247(6) 0.6465(6) 0.0211(15) Uani 1 1 d . . . 
H6A H 1.0284 0.6401 0.6442 0.025 Uiso 1 1 calc R . . 
H6B H 0.9133 0.5550 0.6704 0.025 Uiso 1 1 calc R . . 
C7 C 0.9019(5) 0.7312(6) 0.7342(5) 0.0222(16) Uani 1 1 d . . . 
H7A H 0.8836 0.7118 0.8038 0.027 Uiso 1 1 calc R . . 
H7B H 0.9733 0.7978 0.7536 0.027 Uiso 1 1 calc R . . 
C8 C 0.7923(5) 0.7721(6) 0.6986(5) 0.0186(14) Uani 1 1 d . . . 
C9 C 0.8319(6) 0.8463(6) 0.6202(6) 0.0294(17) Uani 1 1 d . . . 
H9A H 0.7604 0.8687 0.5954 0.044 Uiso 1 1 calc R . . 
H9B H 0.8677 0.7999 0.5542 0.044 Uiso 1 1 calc R . . 
H9C H 0.8924 0.9170 0.6618 0.044 Uiso 1 1 calc R . . 
C10 C 0.7428(6) 0.8471(6) 0.8011(6) 0.0224(15) Uani 1 1 d . . . 
H10A H 0.7232 0.8040 0.8541 0.034 Uiso 1 1 calc R . . 
H10B H 0.6687 0.8673 0.7785 0.034 Uiso 1 1 calc R . . 
H10C H 0.8041 0.9190 0.8375 0.034 Uiso 1 1 calc R . . 
C11 C 0.6910(5) 0.6627(6) 0.6323(5) 0.0181(14) Uani 1 1 d . . . 
H11 H 0.6238 0.6917 0.6052 0.022 Uiso 1 1 calc R . . 
C12 C 0.6355(6) 0.5886(6) 0.7044(6) 0.0217(15) Uani 1 1 d . . . 
H12A H 0.6866 0.6099 0.7754 0.026 Uiso 1 1 calc R . . 
H12B H 0.5522 0.6003 0.7231 0.026 Uiso 1 1 calc R . . 
C13 C 0.6322(5) 0.4658(6) 0.6336(6) 0.0209(15) Uani 1 1 d . . . 
H13 H 0.5955 0.4003 0.6547 0.025 Uiso 1 1 calc R . . 
C14 C 0.6944(5) 0.5868(6) 0.4191(6) 0.0185(15) Uani 1 1 d . . . 
C15 C 0.8143(6) 0.1504(7) 0.4539(9) 0.049(3) Uani 1 1 d . . . 
H15A H 0.8667 0.1987 0.5222 0.073 Uiso 1 1 calc R . . 
H15B H 0.8528 0.1627 0.3876 0.073 Uiso 1 1 calc R . . 
H15C H 0.8028 0.0676 0.4471 0.073 Uiso 1 1 calc R . . 
C16 C 0.5934(9) 0.1752(7) 0.5903(7) 0.056(3) Uani 1 1 d . . . 
H16A H 0.5108 0.1903 0.5914 0.084 Uiso 1 1 calc R . . 
H16B H 0.6428 0.2308 0.6575 0.084 Uiso 1 1 calc R . . 
H16C H 0.5893 0.0950 0.5897 0.084 Uiso 1 1 calc R . . 
C17 C 0.5969(6) 0.2664(6) 0.0819(6) 0.0253(16) Uani 1 1 d . . . 
H17A H 0.6214 0.2883 0.1632 0.030 Uiso 1 1 calc R . . 
H17B H 0.5242 0.2013 0.0641 0.030 Uiso 1 1 calc R . . 
C18 C 0.7007(5) 0.2214(6) 0.0137(5) 0.0196(15) Uani 1 1 d . . . 
C19 C 0.8043(5) 0.3255(6) 0.0186(5) 0.0164(14) Uani 1 1 d . . . 
H19 H 0.8676 0.2938 -0.0310 0.020 Uiso 1 1 calc R . . 
C20 C 0.8183(5) 0.5354(5) 0.0652(5) 0.0138(13) Uani 1 1 d . . . 
C21 C 0.8086(5) 0.6497(6) 0.0541(6) 0.0192(14) Uani 1 1 d . . . 
C22 C 0.6923(6) 0.8315(7) 0.2036(8) 0.044(2) Uani 1 1 d . . . 
H22A H 0.7008 0.9085 0.2620 0.066 Uiso 1 1 calc R . . 
H22B H 0.6449 0.7712 0.2308 0.066 Uiso 1 1 calc R . . 
H22C H 0.6501 0.8314 0.1352 0.066 Uiso 1 1 calc R . . 
C23 C 0.9305(7) 0.9018(7) 0.1014(6) 0.035(2) Uani 1 1 d . . . 
H23A H 0.8893 0.8862 0.0274 0.053 Uiso 1 1 calc R . . 
H23B H 1.0140 0.8895 0.0917 0.053 Uiso 1 1 calc R . . 
H23C H 0.9328 0.9831 0.1485 0.053 Uiso 1 1 calc R . . 
C24 C 0.9375(7) 0.8120(7) 0.3000(6) 0.0338(19) Uani 1 1 d . . . 
H24A H 0.9460 0.8909 0.3551 0.051 Uiso 1 1 calc R . . 
H24B H 1.0184 0.7973 0.2794 0.051 Uiso 1 1 calc R . . 
H24C H 0.8962 0.7540 0.3331 0.051 Uiso 1 1 calc R . . 
C25 C 0.8684(6) 0.3967(6) 0.1379(6) 0.0264(17) Uani 1 1 d . . . 
H25A H 0.8214 0.3744 0.1970 0.032 Uiso 1 1 calc R . . 
H25B H 0.9519 0.3830 0.1433 0.032 Uiso 1 1 calc R . . 
C26 C 0.8724(5) 0.5199(6) 0.1507(6) 0.0182(14) Uani 1 1 d . . . 
H26 H 0.9108 0.5832 0.2151 0.022 Uiso 1 1 calc R . . 
C27 C 0.6559(7) 0.1529(7) -0.1088(6) 0.0313(18) Uani 1 1 d . . . 
H27A H 0.7249 0.1304 -0.1521 0.047 Uiso 1 1 calc R . . 
H27B H 0.6186 0.2020 -0.1407 0.047 Uiso 1 1 calc R . . 
H27C H 0.5952 0.0823 -0.1125 0.047 Uiso 1 1 calc R . . 
C28 C 0.7479(6) 0.1409(6) 0.0661(6) 0.0261(16) Uani 1 1 d . . . 
H28A H 0.6818 0.0741 0.0624 0.039 Uiso 1 1 calc R . . 
H28B H 0.7765 0.1845 0.1451 0.039 Uiso 1 1 calc R . . 
H28C H 0.8155 0.1124 0.0244 0.039 Uiso 1 1 calc R . . 
C29 C 0.5599(5) 0.3721(6) 0.0619(5) 0.0168(14) Uani 1 1 d . . . 
H29A H 0.4702 0.3550 0.0465 0.020 Uiso 1 1 calc R . . 
H29B H 0.5821 0.4413 0.1312 0.020 Uiso 1 1 calc R . . 
C30 C 0.6207(5) 0.4002(5) -0.0350(6) 0.0169(14) Uani 1 1 d . . . 
C31 C 0.8071(5) 0.4114(6) -0.1374(6) 0.0187(15) Uani 1 1 d . . . 
C32 C 0.7616(5) 0.4183(5) -0.0263(5) 0.0153(13) Uani 1 1 d . . . 
N1 N 0.6584(5) 0.5981(5) 0.3398(5) 0.0260(14) Uani 1 1 d . . . 
N2 N 0.8417(5) 0.4000(5) -0.2257(5) 0.0245(14) Uani 1 1 d . . . 
O1 O 0.7430(4) 0.3496(4) 0.3624(4) 0.0274(12) Uani 1 1 d . . . 
O2 O 0.9351(4) 0.5942(4) 0.4475(4) 0.0222(11) Uani 1 1 d . . . 
O3 O 0.7663(4) 0.6518(4) -0.0349(4) 0.0282(12) Uani 1 1 d . . . 
O4 O 0.5672(4) 0.4093(4) -0.1144(4) 0.0209(10) Uani 1 1 d . . . 
Si1 Si 0.66309(16) 0.19298(17) 0.46332(16) 0.0223(5) Uani 1 1 d . . . 
Si2 Si 0.84539(15) 0.80024(16) 0.17115(16) 0.0195(5) Uani 1 1 d . . . 
 
loop_ 
 _atom_site_aniso_label 
 _atom_site_aniso_U_11 
 _atom_site_aniso_U_22 
 _atom_site_aniso_U_33 
 _atom_site_aniso_U_23 
 _atom_site_aniso_U_13 
 _atom_site_aniso_U_12 
C1 0.016(3) 0.033(4) 0.027(4) 0.006(3) -0.002(3) -0.008(3) 
C2 0.013(3) 0.024(4) 0.019(4) 0.008(3) -0.002(3) -0.004(2) 
C3 0.008(3) 0.031(4) 0.015(3) 0.012(3) -0.005(2) -0.004(2) 
C4 0.005(3) 0.032(4) 0.007(3) 0.005(3) -0.002(2) -0.003(2) 
C5 0.008(3) 0.023(3) 0.015(3) 0.003(3) -0.006(2) -0.005(2) 
C6 0.010(3) 0.026(4) 0.020(4) 0.002(3) -0.004(3) -0.002(2) 
C7 0.012(3) 0.035(4) 0.011(3) -0.001(3) -0.006(2) 0.000(3) 
C8 0.011(3) 0.031(4) 0.011(3) 0.007(3) 0.000(2) -0.001(2) 
C9 0.033(4) 0.022(4) 0.026(4) 0.003(3) 0.001(3) -0.002(3) 
C10 0.020(3) 0.029(4) 0.015(3) 0.004(3) -0.004(3) 0.004(3) 
C11 0.002(2) 0.030(4) 0.020(3) 0.006(3) -0.004(2) 0.001(2) 
C12 0.017(3) 0.032(4) 0.012(3) 0.007(3) 0.007(3) -0.002(3) 
C13 0.007(3) 0.035(4) 0.015(3) 0.007(3) -0.007(2) -0.006(2) 
C14 0.007(3) 0.028(4) 0.019(4) 0.010(3) 0.002(3) -0.005(2) 
C15 0.015(3) 0.043(5) 0.086(7) 0.024(5) -0.024(4) -0.005(3) 
C16 0.100(8) 0.026(4) 0.028(5) 0.013(4) -0.007(5) -0.026(5) 
C17 0.015(3) 0.042(4) 0.024(4) 0.019(3) 0.003(3) 0.003(3) 
C18 0.018(3) 0.024(4) 0.017(3) 0.011(3) -0.001(3) -0.002(2) 
C19 0.009(3) 0.029(4) 0.012(3) 0.009(3) 0.000(2) 0.000(2) 
C20 0.005(3) 0.023(3) 0.011(3) 0.005(3) 0.000(2) 0.000(2) 
C21 0.010(3) 0.029(4) 0.017(3) 0.009(3) -0.004(2) -0.002(2) 
C22 0.024(4) 0.030(4) 0.055(6) -0.013(4) 0.002(4) 0.002(3) 
C23 0.042(4) 0.032(4) 0.023(4) 0.010(3) -0.007(3) -0.011(3) 
C24 0.035(4) 0.035(4) 0.021(4) 0.005(3) -0.016(3) -0.008(3) 
C25 0.019(3) 0.037(4) 0.028(4) 0.022(3) -0.007(3) -0.002(3) 
C26 0.010(3) 0.026(4) 0.017(3) 0.008(3) -0.004(2) -0.001(2) 
C27 0.033(4) 0.036(4) 0.018(4) 0.004(3) -0.010(3) 0.001(3) 
C28 0.025(3) 0.027(4) 0.027(4) 0.011(3) -0.004(3) 0.002(3) 
C29 0.006(3) 0.030(4) 0.017(3) 0.012(3) 0.004(2) 0.003(2) 
C30 0.008(3) 0.025(3) 0.015(3) 0.003(3) -0.006(2) 0.004(2) 
C31 0.008(3) 0.022(3) 0.024(4) 0.010(3) -0.003(3) -0.004(2) 
C32 0.012(3) 0.019(3) 0.015(3) 0.007(3) 0.002(2) 0.003(2) 
N1 0.017(3) 0.041(4) 0.019(3) 0.010(3) -0.002(2) 0.001(2) 
N2 0.013(3) 0.043(4) 0.017(3) 0.012(3) 0.003(2) 0.003(2) 
O1 0.029(2) 0.032(3) 0.017(3) 0.007(2) 0.009(2) -0.002(2) 
O2 0.011(2) 0.035(3) 0.017(2) 0.004(2) 0.0078(19) 0.0022(18) 
O3 0.032(3) 0.029(3) 0.023(3) 0.012(2) -0.009(2) 0.000(2) 
O4 0.013(2) 0.034(3) 0.017(2) 0.012(2) -0.0011(19) 0.0002(17) 
Si1 0.0181(9) 0.0245(11) 0.0204(10) 0.0084(8) -0.0037(7) -0.0055(7) 
Si2 0.0106(8) 0.0241(10) 0.0181(10) 0.0032(8) -0.0014(7) -0.0024(7) 
 
_geom_special_details 
; 
 All esds (except the esd in the dihedral angle between two l.s. planes) 
 are estimated using the full covariance matrix.  The cell esds are taken 
 into account individually in the estimation of esds in distances, angles 
 and torsion angles; correlations between esds in cell parameters are only 
 used when they are defined by crystal symmetry.  An approximate (isotropic) 
 treatment of cell esds is used for estimating esds involving l.s. planes. 
; 
 
loop_ 
 _geom_bond_atom_site_label_1 
 _geom_bond_atom_site_label_2 
 _geom_bond_distance 
 _geom_bond_site_symmetry_2 
 _geom_bond_publ_flag 
C1 Si1 1.864(7) . ? 
C1 H1A 0.9800 . ? 
C1 H1B 0.9800 . ? 
C1 H1C 0.9800 . ? 
C2 O1 1.237(8) . ? 
C2 C3 1.459(10) . ? 
C2 Si1 1.914(7) . ? 
C3 C13 1.332(10) . ? 
C3 C4 1.548(9) . ? 
C4 C14 1.481(9) . ? 
C4 C11 1.567(9) . ? 
C4 C5 1.568(8) . ? 
C5 O2 1.188(8) . ? 
C5 C6 1.514(9) . ? 
C6 C7 1.545(9) . ? 
C6 H6A 0.9900 . ? 
C6 H6B 0.9900 . ? 
C7 C8 1.537(9) . ? 
C7 H7A 0.9900 . ? 
C7 H7B 0.9900 . ? 
C8 C10 1.502(9) . ? 
C8 C9 1.560(10) . ? 
C8 C11 1.568(8) . ? 
C9 H9A 0.9800 . ? 
C9 H9B 0.9800 . ? 
C9 H9C 0.9800 . ? 
C10 H10A 0.9800 . ? 
C10 H10B 0.9800 . ? 
C10 H10C 0.9800 . ? 
C11 C12 1.534(9) . ? 
C11 H11 1.0000 . ? 
C12 C13 1.480(10) . ? 
C12 H12A 0.9900 . ? 
C12 H12B 0.9900 . ? 
C13 H13 0.9500 . ? 
C14 N1 1.134(9) . ? 
C15 Si1 1.866(8) . ? 
C15 H15A 0.9800 . ? 
C15 H15B 0.9800 . ? 
C15 H15C 0.9800 . ? 
C16 Si1 1.834(9) . ? 
C16 H16A 0.9800 . ? 
C16 H16B 0.9800 . ? 
C16 H16C 0.9800 . ? 
C17 C18 1.534(10) . ? 
C17 C29 1.539(10) . ? 
C17 H17A 0.9900 . ? 
C17 H17B 0.9900 . ? 
C18 C27 1.522(9) . ? 
C18 C28 1.530(10) . ? 
C18 C19 1.533(8) . ? 
C19 C25 1.557(9) . ? 
C19 C32 1.582(9) . ? 
C19 H19 1.0000 . ? 
C20 C26 1.318(9) . ? 
C20 C21 1.488(10) . ? 
C20 C32 1.537(8) . ? 
C21 O3 1.224(8) . ? 
C21 Si2 1.923(7) . ? 
C22 Si2 1.851(8) . ? 
C22 H22A 0.9800 . ? 
C22 H22B 0.9800 . ? 
C22 H22C 0.9800 . ? 
C23 Si2 1.868(8) . ? 
C23 H23A 0.9800 . ? 
C23 H23B 0.9800 . ? 
C23 H23C 0.9800 . ? 
C24 Si2 1.868(7) . ? 
C24 H24A 0.9800 . ? 
C24 H24B 0.9800 . ? 
C24 H24C 0.9800 . ? 
C25 C26 1.468(10) . ? 
C25 H25A 0.9900 . ? 
C25 H25B 0.9900 . ? 
C26 H26 0.9500 . ? 
C27 H27A 0.9800 . ? 
C27 H27B 0.9800 . ? 
C27 H27C 0.9800 . ? 
C28 H28A 0.9800 . ? 
C28 H28B 0.9800 . ? 
C28 H28C 0.9800 . ? 
C29 C30 1.499(9) . ? 
C29 H29A 0.9900 . ? 
C29 H29B 0.9900 . ? 
C30 O4 1.212(8) . ? 
C30 C32 1.550(8) . ? 
C31 N2 1.149(9) . ? 
C31 C32 1.469(9) . ? 
 
loop_ 
 _geom_angle_atom_site_label_1 
 _geom_angle_atom_site_label_2 
 _geom_angle_atom_site_label_3 
 _geom_angle 
 _geom_angle_site_symmetry_1 
 _geom_angle_site_symmetry_3 
 _geom_angle_publ_flag 
Si1 C1 H1A 109.5 . . ? 
Si1 C1 H1B 109.5 . . ? 
H1A C1 H1B 109.5 . . ? 
Si1 C1 H1C 109.5 . . ? 
H1A C1 H1C 109.5 . . ? 
H1B C1 H1C 109.5 . . ? 
O1 C2 C3 119.3(6) . . ? 
O1 C2 Si1 113.2(5) . . ? 
C3 C2 Si1 127.5(5) . . ? 
C13 C3 C2 125.9(6) . . ? 
C13 C3 C4 111.5(6) . . ? 
C2 C3 C4 122.6(6) . . ? 
C14 C4 C3 112.1(5) . . ? 
C14 C4 C11 112.6(6) . . ? 
C3 C4 C11 102.3(5) . . ? 
C14 C4 C5 107.5(5) . . ? 
C3 C4 C5 109.2(5) . . ? 
C11 C4 C5 113.1(5) . . ? 
O2 C5 C6 125.2(5) . . ? 
O2 C5 C4 122.4(5) . . ? 
C6 C5 C4 112.4(5) . . ? 
C5 C6 C7 112.3(6) . . ? 
C5 C6 H6A 109.1 . . ? 
C7 C6 H6A 109.1 . . ? 
C5 C6 H6B 109.1 . . ? 
C7 C6 H6B 109.1 . . ? 
H6A C6 H6B 107.9 . . ? 
C8 C7 C6 116.3(5) . . ? 
C8 C7 H7A 108.2 . . ? 
C6 C7 H7A 108.2 . . ? 
C8 C7 H7B 108.2 . . ? 
C6 C7 H7B 108.2 . . ? 
H7A C7 H7B 107.4 . . ? 
C10 C8 C7 109.8(5) . . ? 
C10 C8 C9 108.3(6) . . ? 
C7 C8 C9 110.3(5) . . ? 
C10 C8 C11 110.2(5) . . ? 
C7 C8 C11 109.6(6) . . ? 
C9 C8 C11 108.6(5) . . ? 
C8 C9 H9A 109.5 . . ? 
C8 C9 H9B 109.5 . . ? 
H9A C9 H9B 109.5 . . ? 
C8 C9 H9C 109.5 . . ? 
H9A C9 H9C 109.5 . . ? 
H9B C9 H9C 109.5 . . ? 
C8 C10 H10A 109.5 . . ? 
C8 C10 H10B 109.5 . . ? 
H10A C10 H10B 109.5 . . ? 
C8 C10 H10C 109.5 . . ? 
H10A C10 H10C 109.5 . . ? 
H10B C10 H10C 109.5 . . ? 
C12 C11 C4 106.8(5) . . ? 
C12 C11 C8 113.6(5) . . ? 
C4 C11 C8 112.9(5) . . ? 
C12 C11 H11 107.8 . . ? 
C4 C11 H11 107.8 . . ? 
C8 C11 H11 107.8 . . ? 
C13 C12 C11 105.0(5) . . ? 
C13 C12 H12A 110.7 . . ? 
C11 C12 H12A 110.7 . . ? 
C13 C12 H12B 110.7 . . ? 
C11 C12 H12B 110.7 . . ? 
H12A C12 H12B 108.8 . . ? 
C3 C13 C12 113.5(6) . . ? 
C3 C13 H13 123.3 . . ? 
C12 C13 H13 123.3 . . ? 
N1 C14 C4 176.6(8) . . ? 
Si1 C15 H15A 109.5 . . ? 
Si1 C15 H15B 109.5 . . ? 
H15A C15 H15B 109.5 . . ? 
Si1 C15 H15C 109.5 . . ? 
H15A C15 H15C 109.5 . . ? 
H15B C15 H15C 109.5 . . ? 
Si1 C16 H16A 109.5 . . ? 
Si1 C16 H16B 109.5 . . ? 
H16A C16 H16B 109.5 . . ? 
Si1 C16 H16C 109.5 . . ? 
H16A C16 H16C 109.5 . . ? 
H16B C16 H16C 109.5 . . ? 
C18 C17 C29 115.7(6) . . ? 
C18 C17 H17A 108.4 . . ? 
C29 C17 H17A 108.4 . . ? 
C18 C17 H17B 108.4 . . ? 
C29 C17 H17B 108.4 . . ? 
H17A C17 H17B 107.4 . . ? 
C27 C18 C28 109.2(6) . . ? 
C27 C18 C19 109.4(5) . . ? 
C28 C18 C19 109.5(5) . . ? 
C27 C18 C17 110.9(5) . . ? 
C28 C18 C17 108.3(6) . . ? 
C19 C18 C17 109.5(6) . . ? 
C18 C19 C25 115.4(5) . . ? 
C18 C19 C32 113.1(5) . . ? 
C25 C19 C32 105.5(5) . . ? 
C18 C19 H19 107.5 . . ? 
C25 C19 H19 107.5 . . ? 
C32 C19 H19 107.5 . . ? 
C26 C20 C21 126.4(6) . . ? 
C26 C20 C32 111.9(6) . . ? 
C21 C20 C32 121.7(5) . . ? 
O3 C21 C20 119.4(6) . . ? 
O3 C21 Si2 113.8(5) . . ? 
C20 C21 Si2 126.6(5) . . ? 
Si2 C22 H22A 109.5 . . ? 
Si2 C22 H22B 109.5 . . ? 
H22A C22 H22B 109.5 . . ? 
Si2 C22 H22C 109.5 . . ? 
H22A C22 H22C 109.5 . . ? 
H22B C22 H22C 109.5 . . ? 
Si2 C23 H23A 109.5 . . ? 
Si2 C23 H23B 109.5 . . ? 
H23A C23 H23B 109.5 . . ? 
Si2 C23 H23C 109.5 . . ? 
H23A C23 H23C 109.5 . . ? 
H23B C23 H23C 109.5 . . ? 
Si2 C24 H24A 109.5 . . ? 
Si2 C24 H24B 109.5 . . ? 
H24A C24 H24B 109.5 . . ? 
Si2 C24 H24C 109.5 . . ? 
H24A C24 H24C 109.5 . . ? 
H24B C24 H24C 109.5 . . ? 
C26 C25 C19 105.1(6) . . ? 
C26 C25 H25A 110.7 . . ? 
C19 C25 H25A 110.7 . . ? 
C26 C25 H25B 110.7 . . ? 
C19 C25 H25B 110.7 . . ? 
H25A C25 H25B 108.8 . . ? 
C20 C26 C25 114.3(6) . . ? 
C20 C26 H26 122.8 . . ? 
C25 C26 H26 122.8 . . ? 
C18 C27 H27A 109.5 . . ? 
C18 C27 H27B 109.5 . . ? 
H27A C27 H27B 109.5 . . ? 
C18 C27 H27C 109.5 . . ? 
H27A C27 H27C 109.5 . . ? 
H27B C27 H27C 109.5 . . ? 
C18 C28 H28A 109.5 . . ? 
C18 C28 H28B 109.5 . . ? 
H28A C28 H28B 109.5 . . ? 
C18 C28 H28C 109.5 . . ? 
H28A C28 H28C 109.5 . . ? 
H28B C28 H28C 109.5 . . ? 
C30 C29 C17 112.2(5) . . ? 
C30 C29 H29A 109.2 . . ? 
C17 C29 H29A 109.2 . . ? 
C30 C29 H29B 109.2 . . ? 
C17 C29 H29B 109.2 . . ? 
H29A C29 H29B 107.9 . . ? 
O4 C30 C29 124.5(5) . . ? 
O4 C30 C32 121.1(6) . . ? 
C29 C30 C32 114.4(5) . . ? 
N2 C31 C32 176.6(7) . . ? 
C31 C32 C20 112.1(5) . . ? 
C31 C32 C30 109.1(5) . . ? 
C20 C32 C30 110.4(5) . . ? 
C31 C32 C19 110.8(5) . . ? 
C20 C32 C19 102.7(5) . . ? 
C30 C32 C19 111.6(5) . . ? 
C16 Si1 C1 110.1(4) . . ? 
C16 Si1 C15 109.5(5) . . ? 
C1 Si1 C15 112.1(4) . . ? 
C16 Si1 C2 117.9(4) . . ? 
C1 Si1 C2 103.3(3) . . ? 
C15 Si1 C2 103.7(3) . . ? 
C22 Si2 C23 110.5(4) . . ? 
C22 Si2 C24 112.2(4) . . ? 
C23 Si2 C24 109.4(3) . . ? 
C22 Si2 C21 102.8(3) . . ? 
C23 Si2 C21 104.6(3) . . ? 
C24 Si2 C21 116.9(3) . . ? 
 
_diffrn_measured_fraction_theta_max    0.856 
_diffrn_reflns_theta_full              27.38 
_diffrn_measured_fraction_theta_full   0.856 
_refine_diff_density_max    0.911 
_refine_diff_density_min   -0.935 
_refine_diff_density_rms    0.154 
